# Supplementary material for: Serum uric acid in Korean children and adolescents: reference percentiles and association with metabolic syndrome
Source: PubMed Central journal article supplement — Ann Pediatr Endocrinol Metab. 2020 Jun 30;25(2):104–11. doi: 10.6065/apem.1938156.078 (PMC7336265; doi:10.6065/apem.1938156.078), 2020-06-30
Supplement: apem-1938156-078-suppl.pdf [file apem-1938156-078-suppl.pdf]

| Total     | WC    | BMI     | SBP     | DBP     | FPG     | Log TG  | HDL-C    | LDL-C     | Age      | CRP       | Uric acid |
|-----------|-------|---------|---------|---------|---------|---------|----------|-----------|----------|-----------|-----------|
| WC        | 1.000 | 0.907** | 0.425** | 0.291** | 0.098** | 0.263** | -0.339** | 0.141**   | 0.346**  | 0.241**   | 0.476**   |
| BMI       |       | 1.000   | 0.398** | 0.271** | 0.083** | 0.260** | -0.323** | 0.172**   | 0.329**  | 0.245**   | 0.402**   |
| SBP       |       |         | 1.000   | 0.486** | 0.168** | 0.158** | -0.164** | 0.065*    | 0.199**  | 0.097**   | 0.308**   |
|           |       |         |         |         |         |         |          | (P=0.017) |          |           |           |
| DBP       |       |         |         | 1.000   | -0.024  | 0.123** | -0.099** | 0.057*    | 0.338**  | 0.062*    | 0.161**   |
|           |       |         |         |         |         |         |          | (P=0.035) |          | (P=0.024) |           |
| FPG       |       |         |         |         | 1.000   | 0.115** | -0.092** | 0.026     | -0.218** | 0.065*    | -0.010    |
|           |       |         |         |         |         |         |          |           |          | (P=0.018) |           |
| LogTG     |       |         |         |         |         | 1.000   | -0.382** | 0.132**   | 0.044    | 0.049     | 0.094**   |
| HDL-C     |       |         |         |         |         |         | 1.000    | 0.032     | -0.042   | -0.142**  | -0.260**  |
| LDL-C     |       |         |         |         |         |         |          | 1.000     | 0.032    | 0.041     | 0.031     |
| Age       |       |         |         |         |         |         |          |           | 1.000    | -0.002    | 0.202**   |
| CRP       |       |         |         |         |         |         |          |           |          | 1.000     | 0.098**   |
| Uric acid |       |         |         |         |         |         |          |           |          |           | 1.000     |

| Male      | WC    | BMI     | SBP     | DBP     | FPG       | Log TG  | HDL-C    | LDL-C   | Age      | CRP       | Uric acid |
|-----------|-------|---------|---------|---------|-----------|---------|----------|---------|----------|-----------|-----------|
| WC        | 1.000 | 0.932** | 0.461** | 0.311** | 0.091*    | 0.360** | -0.351** | 0.232** | 0.372**  | 0.217**   | 0.446**   |
|           |       |         |         |         | (P=0.016) |         |          |         |          |           |           |
| BMI       |       | 1.000   | 0.449** | 0.271** | 0.106**   | 0.345** | -0.343** | 0.264** | 0.299**  | 0.230**   | 0.447**   |
| SBP       |       |         | 1.000   | 0.490** | 0.088*    | 0.234** | -0.142** | 0.143** | 0.324**  | 0.088*    | 0.287**   |
|           |       |         |         |         | (P=0.020) |         |          |         |          | (P=0.021) |           |
| DBP       |       |         |         | 1.000   | -0.020    | 0.182** | -0.121** | 0.103** | 0.421**  | 0.056     | 0.188**   |
| FPG       |       |         |         |         | 1.000     | 0.110** | -0.033   | 0.043   | -0.161** | 0.037     | -0.127**  |
| LogTG     |       |         |         |         |           | 1.000   | -0.402** | 0.132** | 0.155**  | 0.037     | 0.163**   |
| HDL-C     |       |         |         |         |           |         | 1.000    | 0.035   | -0.154** | -0.115**  | -0.245**  |
| LDL-C     |       |         |         |         |           |         |          | 1.000   | 0.014    | 0.030     | 0.087*    |
|           |       |         |         |         |           |         |          |         |          |           | (P=0.021) |
| Age       |       |         |         |         |           |         |          |         | 1.000    | -0.055    | 0.378**   |
| CRP       |       |         |         |         |           |         |          |         |          | 1.000     | 0.020     |
| Uric acid |       |         |         |         |           |         |          |         |          |           | 1.000     |

| Female    | WC    | BMI     | SBP     | DBP     | FPG     | Log TG  | HDL-C    | LDL-C     | Age       | CRP       | Uric acid |
|-----------|-------|---------|---------|---------|---------|---------|----------|-----------|-----------|-----------|-----------|
| WC        | 1.000 | 0.893** | 0.273** | 0.260** | 0.009   | 0.184** | -0.262** | 0.086*    | 0.349**   | 0.260**   | 0.364**   |
|           |       |         |         |         |         |         |          | (P=0.029) |           |           |           |
| BMI       |       | 1.000   | 0.305** | 0.266** | 0.008   | 0.172** | -0.277** | 0.087*    | 0.372**   | 0.256**   | 0.346**   |
|           |       |         |         |         |         |         |          | (P=0.027) |           |           |           |
| SBP       |       |         | 1.000   | 0.500** | 0.210** | 0.114** | -0.110** | 0.033     | 0.074     | 0.077     | 0.097*    |
|           |       |         |         |         |         |         |          |           |           |           | (P=0.014) |
| DBP       |       |         |         | 1.000   | -0.048  | 0.048   | -0.061   | 0.008     | 0.235**   | 0.066     | 0.125**   |
| FPG       |       |         |         |         | 1.000   | 0.155** | -0.121** | 0.038     | -0.308**  | 0.090*    | -0.045    |
|           |       |         |         |         |         |         |          |           |           | (P=0.024) |           |
| LogTG     |       |         |         |         |         | 1.000   | -0.397** | 0.120**   | 0.086*    | 0.078*    | 0.124**   |
|           |       |         |         |         |         |         |          |           | (P=0.029) | (P=0.048) |           |
| HDL-C     |       |         |         |         |         |         | 1.000    | 0.000     | 0.072     | -0.160**  | -0.155**  |
| LDL-C     |       |         |         |         |         |         |          | 1.000     | 0.050     | 0.070     | 0.091*    |
|           |       |         |         |         |         |         |          |           |           |           | (P=0.021) |
| Age       |       |         |         |         |         |         |          |           | 1.000     | 0.071     | 0.032     |
| CRP       |       |         |         |         |         |         |          |           |           | 1.000     | 0.186**   |
| Uric acid |       |         |         |         |         |         |          |           |           |           | 1.000     |

UA1, the lowest quartile of serum uric acid; UA2, the second quartile of serum uric acid; UA3, the third quartile of serum uric acid; UA4, the highest quartile of serum uric acid; WC, waist circumference; BMI, body mass index; SBP, systolic blood pressure; DBP, diastolic blood pressure; FPG, fasting plasma glucose; TG, triglyceride; HDL-C, high-density lipoprotein cholesterol; LDL-C, low-density lipoprotein cholesterol; CRP, high-sensitivity C-reactive protein.

\*P<0.05. \*\*P<0.01.
